# Supplementary material for: A Coumarin-Based Fluorescence Probe for Selective Recognition of Cu2+ Ions and Live Cell Imaging
Source: Hindawi journal article supplement (doi:10.1155/2019/2814947), 2019-10-30
Supplement: f1 [file 2814947.f1.docx]

**A coumarin-based fluorescence probe for selective recognition of Cu2+ ions and live cells imaging**

Guangjie He1,*, Nana Ma2, Linlin Li1, Chenyan Xie1, Linlin Yang1,*, Jinhe Xu1, Junli Wang3,*

1 XinxiangKey Laboratory of Forensic Science Evidence, School of Forensic Medicine, Xinxiang Medical University, Jinsui Road No. 601, Xinxiang, 453003, Henan Province, P. R. China

2 School of Chemistry and Chemical Engineering, Henan Key laboratory of Organic Functional Molecule and Drug Innovation, Henan Key Laboratory of Boron Chemistry and Advanced Energy Materials, Henan Normal University, East of Construction Road No. 46, Xinxiang, 453007, Henan Province, P. R. China

3 College of Chemistry and Chemical Engineering, Xinxiang University, Jinsui Road No. 191, Xinxiang, 453003, Henan Province, P. R. China

**1. Materials and methods**

All chemicals and reagents were commercially available and were analytical grade. All solvents were purified by standard procedures. 1H NMR and 13C NMR spectra were performed on a Bruker Ascend™ 400 spectrometer and chemical shifts were given in ppm from tetramethylsilane (TMS) as internal standard. Mass spectrum was recorded on a Bruker Micro TOF-Q III spectrometer. UV-vis absorption spectra were measured on Shimadzu UV2600 spectrophotometer. Fluorescence spectra were obtained on Edinburgh Instruments FS-5 fluorescence spectrophotometer. Cell imaging experiments were recorded with Leica DMI8 inverted fluorescence microscope.

**2. Synthesis**

Coumarin hydrazide was synthesized according to the procedure reported in the literatures.[41, 42] The synthetic route of L was shown in Scheme 1. Coumarin hydrazine (0.688 g, 2.5 mmol) and 2-acetylpyrazine (0.305 g, 2.5 mmol) were dissolved in the 60 mL methanol. The reaction mixture was refluxed for 5 hours. After the mixture solution was cooled to room temperature, the resulting precipitate was filtered to give (E)-7-(diethylamino)-2-oxo-N'-(1-(pyrazin-2-yl)ethylidene)-2H-chromene-3-carbohydrazide (L) as a yellow solid. 1H NMR, 13C NMR and ESI-MS mass spectra of Lwere shown in Fig. S3, S4 and S5, respectively. 1H NMR (400 MHz, CDCl3): δ (ppm) 12.140 (s, 1H), 9.587 (s, 1H), 8.904 (s, 1H), 8.554 (m, 2H, J = 7.2), 7.526 (d, 1H, J = 8.8Hz), 6.726 (d, 1H, J = 2.4 Hz), 6.566 (s, 1H), 3.538-3.484 (q, 4H, J =7.2 Hz), 2.548 (s, 3H),1.306-1.270 (t, 6H, J = 7.2 Hz). 13C NMR (100 MHz, CDCl3): δ (ppm) 163.130, 160.088, 157.945, 153.150, 151.400, 150.752, 149.467, 143.980, 143.752, 142.848, 131.587, 110.424, 108.923, 108.673, 96.649, 45.239, 12.456. ESI-MS: m/z: 402.1546, [(L)+Na]+.

**3. Spectroscopic measurements**

The stock solutions (2.0×10−2 M) of the metal ions such as Cr3+, Ag+, Fe3+, K+, Na+, Mg2+, Pb2+, Ca2+, Hg2+, Mn2+, Cd2+, Fe2+, Zn2+, Ni2+, Co2+ and Cu2+ were prepared in aqueous solutions. The stock solution of L (1.0×10-3 M) were prepared in CH3CN solution. All absorbance and fluorescence spectral measurements were carried out in CH3CN/HEPES (3: 2, v/v) buffer solution (pH = 7.4). The fluorescence spectra were recorded under excitation at 438 nm by scanning the spectra between 450 nm and 600 nm. The slit widths for excitation and emission spectra were both 1.2 nm.

**4. Cell culture and imaging**

The fluorescence imaging experiment of L for Cu2+ sensing was performed in human hepatoma HepG2 cells. The HepG2 cells were cultured in the 12-hole culture plate for 24 hours with 10% fetal bovine serum (FBS). Then, the cells were treated with L (10 µM) and allowed to incubate for 2.5 hours at 37℃. After three rinses with PBS, the fluorescence emission was detected and photographed with an inverted fluorescence microscope. Then, the HepG2 cells were further incubated with 6 equivalents of Cu2+ for 30 minutes and rinsed three times with PBS buffer for fluorescence imaging.

Fig. S1 The Job’s plot showed the 1:1 complex of probe **L** and Cu2+ from absorption and fluorescence spectra.

Fig. S2 UV-vis absorption spectra of probe **L** (10 μM) upon additions of various metal ions in CH3CN/HEPES (3:2, v/v) solutions.

**Scheme S1 Cartesian coordinates**

**L-Cu2+**

x y z

6 0.222985 0.586067 -0.384036

6 2.549368 0.108224 -0.101585

6 2.271760 -1.244709 0.235917

6 0.929924 -1.672104 0.223760

6 -0.089338 -0.805402 -0.136497

1 3.944659 1.661125 -0.438889

6 3.820323 0.626530 -0.150883

6 3.383667 -2.079741 0.543080

1 0.679399 -2.699004 0.477190

6 4.663319 -1.596110 0.505825

6 4.933330 -0.220994 0.154756

1 3.204366 -3.115493 0.814675

1 5.476994 -2.258758 0.766378

7 6.197828 0.251497 0.117628

6 6.509128 1.676311 -0.138654

1 7.439465 1.885277 0.395485

1 5.738017 2.297861 0.320102

6 6.674065 1.984395 -1.633301

1 5.748582 1.806185 -2.189431

1 6.948620 3.037322 -1.748266

1 7.467640 1.378710 -2.081120

6 7.383365 -0.614173 0.324945

1 8.189555 -0.168797 -0.263519

1 7.187684 -1.597340 -0.105828

6 7.792070 -0.710065 1.801122

1 7.009409 -1.173174 2.409742

1 8.695782 -1.322260 1.877219

1 8.016757 0.275726 2.219370

8 1.514099 0.967844 -0.384038

8 -0.596795 1.512595 -0.572251

6 -1.490926 -1.314353 -0.159578

8 -1.927130 -2.156158 0.586348

7 -2.319378 -0.690175 -1.175503

7 -3.486927 -1.386206 -1.538383

6 -4.598196 -1.191789 -0.917620

6 -5.714500 -2.097640 -1.382923

1 -5.956260 -2.839372 -0.611933

1 -6.624241 -1.533356 -1.611231

1 -5.385961 -2.636271 -2.272382

6 -4.952302 -0.176066 0.136771

6 -6.083684 -0.407904 0.940139

7 -6.547249 0.472338 1.828478

6 -5.907867 1.635234 1.924950

6 -4.767141 1.904753 1.162422

7 -4.285113 1.001175 0.290789

1 -6.628238 -1.342594 0.868222

1 -6.295055 2.372042 2.623658

1 -4.238077 2.847260 1.254114

9 -2.511892 1.282215 -0.415893

1 -1.785848 -0.536756 -2.035857

**L'-Cu2+**

x y z

6 0.222985 0.586067 -0.384036

6 2.549368 0.108224 -0.101585

6 2.271760 -1.244709 0.235917

6 0.929924 -1.672104 0.223760

6 -0.089338 -0.805402 -0.136497

1 3.944659 1.661125 -0.438889

6 3.820323 0.626530 -0.150883

6 3.383667 -2.079741 0.543080

1 0.679399 -2.699004 0.477190

6 4.663319 -1.596110 0.505825

6 4.933330 -0.220994 0.154756

1 3.204366 -3.115493 0.814675

1 5.476994 -2.258758 0.766378

7 6.197828 0.251497 0.117628

6 6.509128 1.676311 -0.138654

1 7.439465 1.885277 0.395485

1 5.738017 2.297861 0.320102

6 6.674065 1.984395 -1.633301

1 5.748582 1.806185 -2.189431

1 6.948620 3.037322 -1.748266

1 7.467640 1.378710 -2.081120

6 7.383365 -0.614173 0.324945

1 8.189555 -0.168797 -0.263519

1 7.187684 -1.597340 -0.105828

6 7.792070 -0.710065 1.801122

1 7.009409 -1.173174 2.409742

1 8.695782 -1.322260 1.877219

1 8.016757 0.275726 2.219370

8 1.514099 0.967844 -0.384038

8 -0.596795 1.512595 -0.572251

6 -1.490926 -1.314353 -0.159578

8 -1.927130 -2.156158 0.586348

7 -2.319378 -0.690175 -1.175503

7 -3.486927 -1.386206 -1.538383

6 -4.598196 -1.191789 -0.917620

6 -5.714500 -2.097640 -1.382923

1 -5.956260 -2.839372 -0.611933

1 -6.624241 -1.533356 -1.611231

1 -5.385961 -2.636271 -2.272382

6 -4.952302 -0.176066 0.136771

6 -6.083684 -0.407904 0.940139

7 -6.547249 0.472338 1.828478

6 -5.907867 1.635234 1.924950

6 -4.767141 1.904753 1.162422

7 -4.285113 1.001175 0.290789

1 -6.628238 -1.342594 0.868222

1 -6.295055 2.372042 2.623658

1 -4.238077 2.847260 1.254114

29 -2.511892 1.282215 -0.415893

1 -1.785848 -0.536756 -2.035857


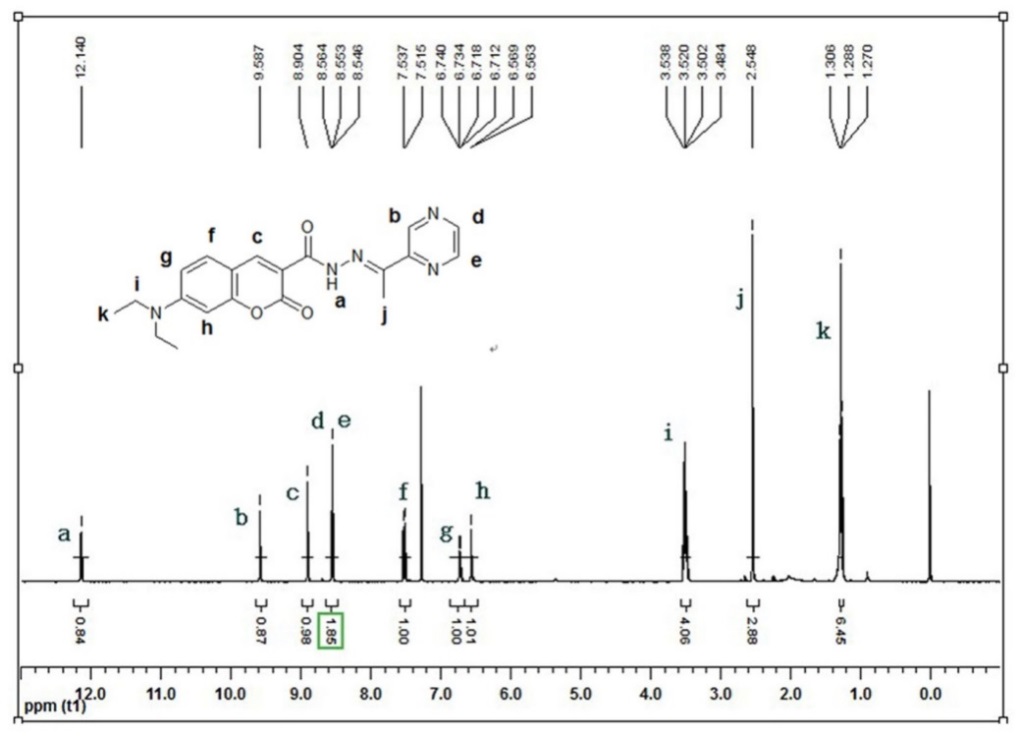


Fig. S3 1H NMR spectrum of probe **L**.


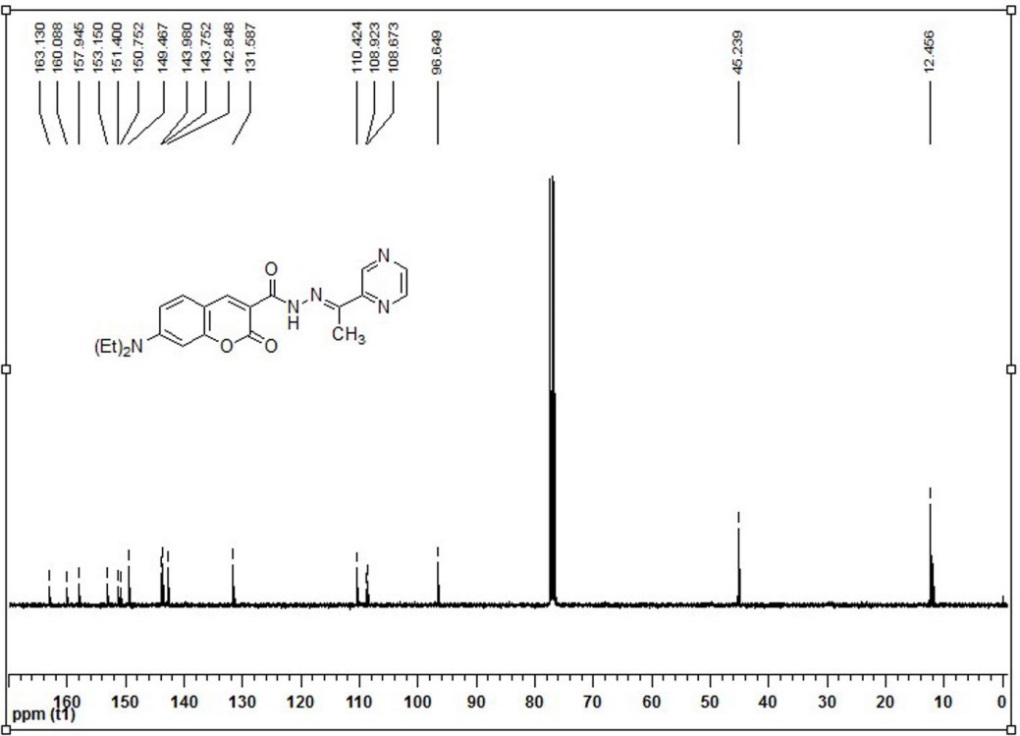


Fig. S4 13C NMR spectrum of probe **L**.


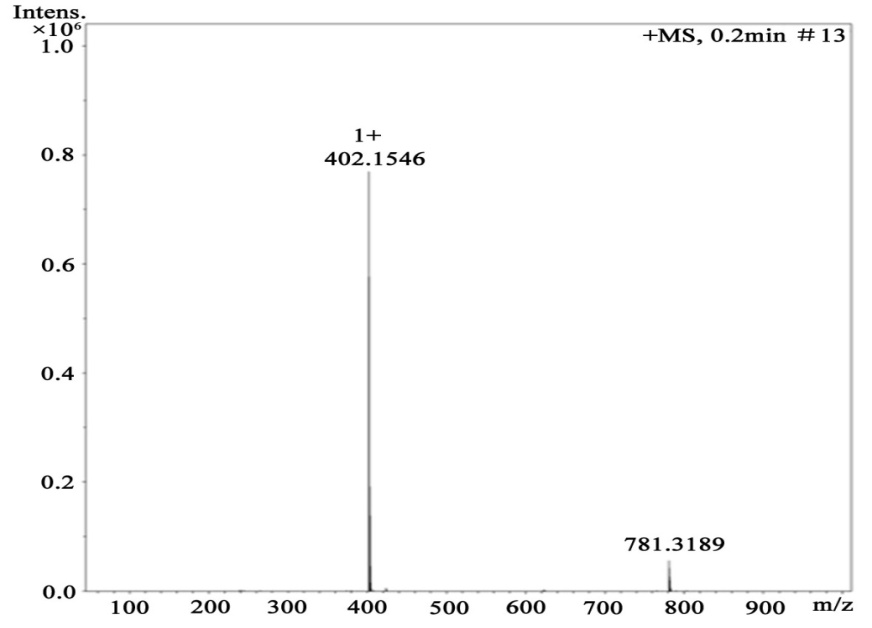


Fig. S5 ESI-MS mass spectrum of probe **L**.
